# Supplementary material for: Retinal perivascular macrophages regulate immune cell infiltration during neuroinflammation in mouse models of ocular disease
Source: JCI journal article supplement (doi:10.1172/jci180904), 2024-08-29
Supplement: sd1 [file 1]

A

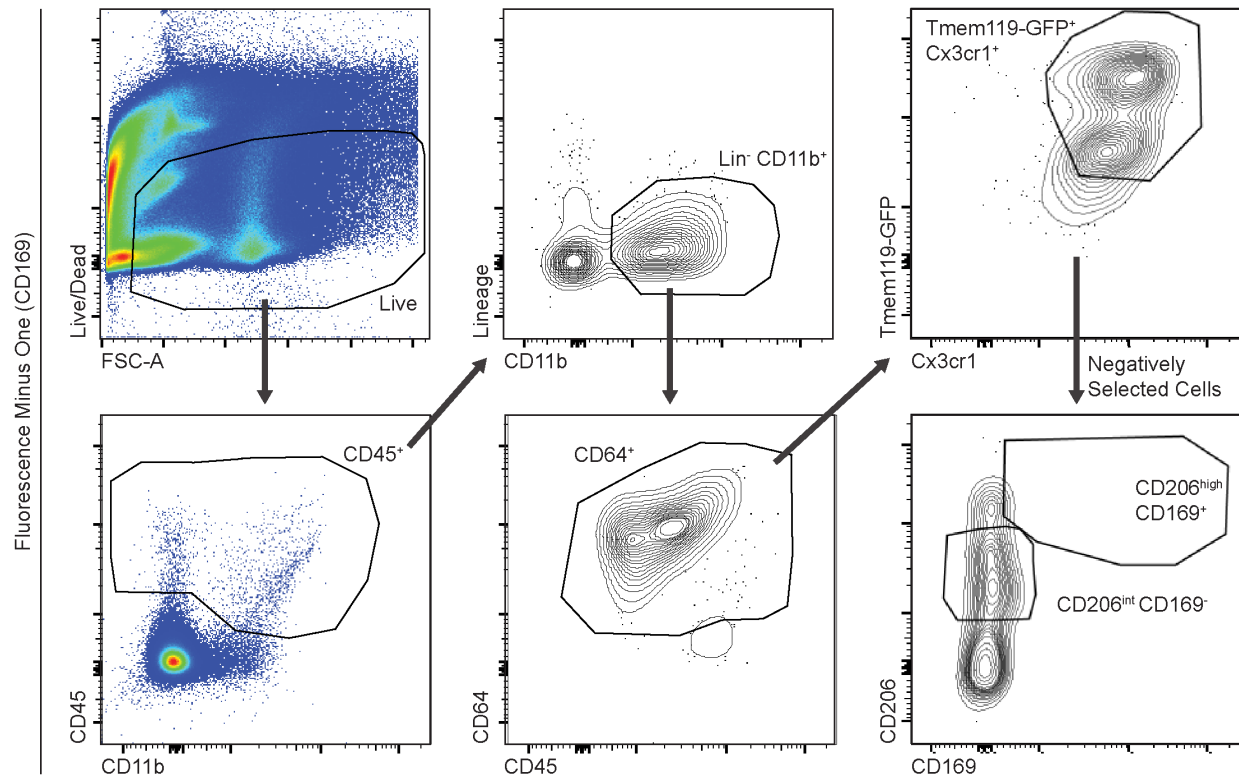

**Supplemental Figure 1: Fluorescence minus one control from CD169 multi-parameter flow cytometry studies.** See Figure 1 for gating strategy details and Figure 1A (lower right panel) for direct comparison.

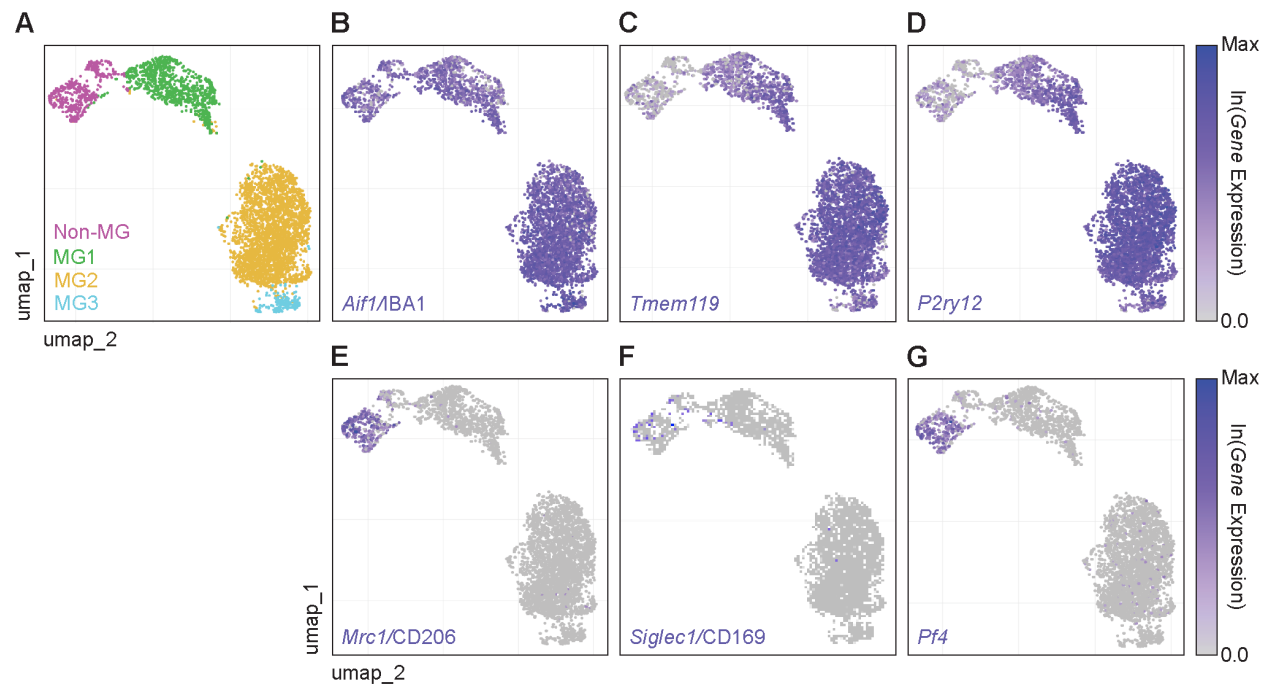

**Supplemental Figure 2: Non-microglia express greater *Pf4* and *Mrc1* than microglia.**  
A: UMAP dimension plot. B-G: Feature plots for *Aif1/IBA1*, *Tmem119*, *P2ry12*, *Mrc1/CD206*, *Siglec1/CD169*, and *Pf4/CXCL4*.

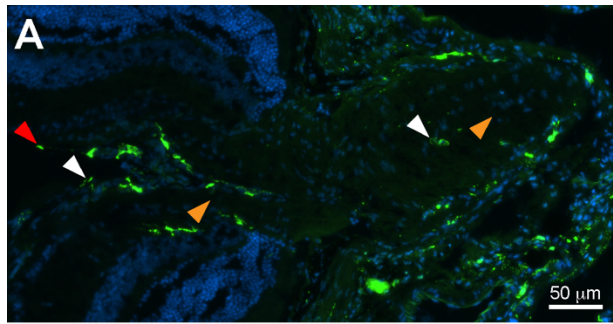

DAPI Pf4-zsGreen

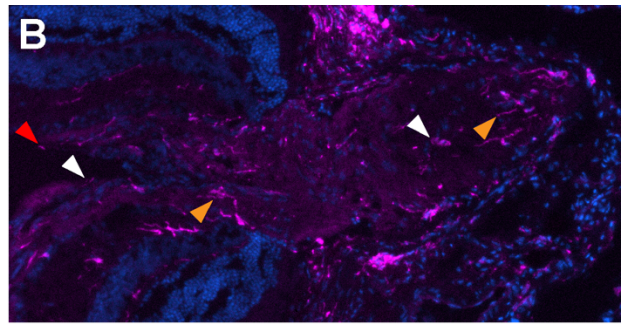

DAPI IBA1

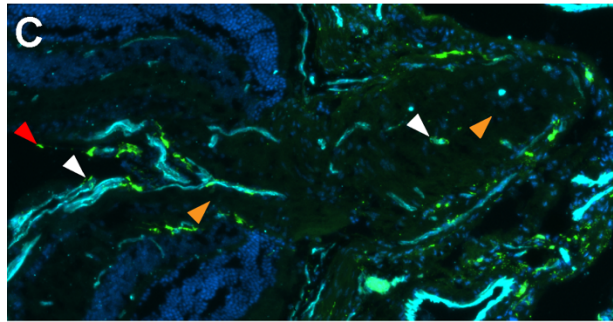

DAPI Pf4-zsGreen CD31

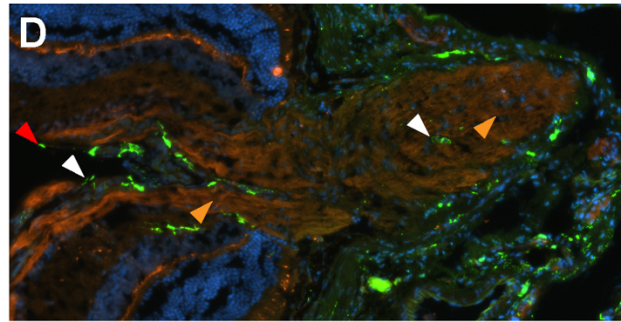

DAPI Pf4-zsGreen Neurofilament

**Supplemental Figure 3: Optic nerve head macrophages include both perivascular macrophages and hyalocytes.** Representative immunofluorescence section through the optic nerve head from *Pf4-zsGreen* mice. Arrowheads indicate hyalocytes (red), perivascular macrophages (white), and microglia (orange).

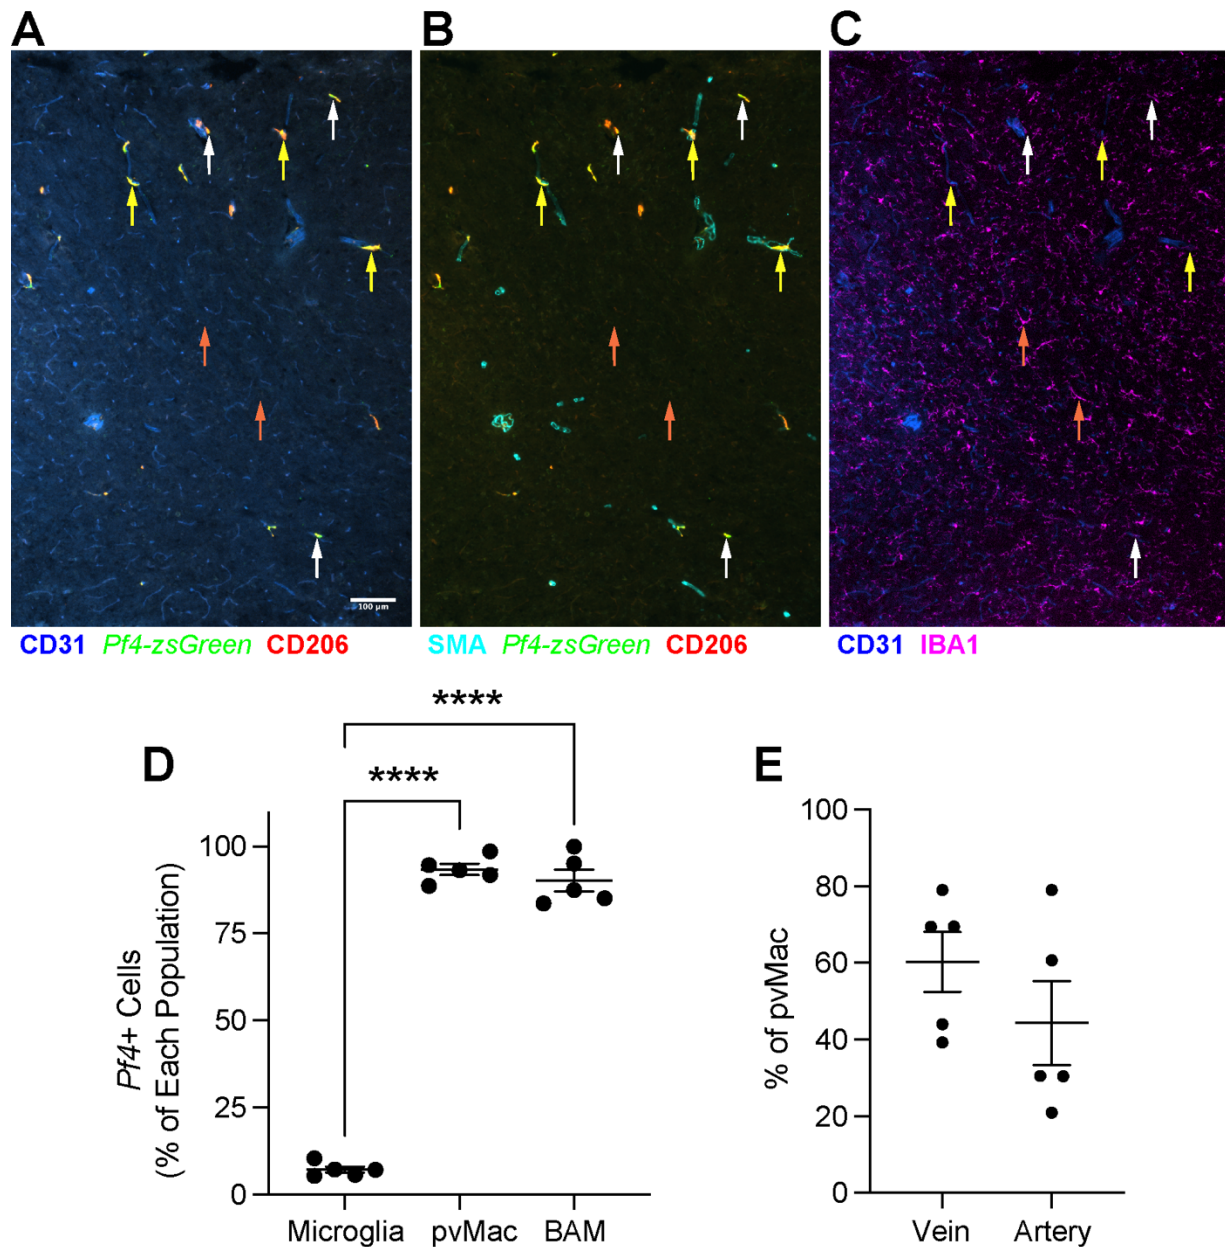

**Supplemental Figure 4: Brain perivascular macrophages are *Pf4*<sup>+</sup> but present in arteries and veins equally.** A-C: Representative frozen section of the brain from *Pf4-DTR* mice. Yellow arrows highlight perivascular macrophages (pvMac) on arterioles, white arrows show pvMac on venules, and orange arrows demonstrate microglia. D: Perivascular macrophages (pvMac) and border-associated macrophages (BAMs) are nearly 100% *Pf4*<sup>+</sup>. E: Perivascular macrophages (pvMac) are equally found on arterioles and venules in brains. Data were analyzed by repeated measures ANOVA followed by Tukey's multiple comparisons test: \*\*\*\*  $p < 0.0001$  (D) or paired t-test (E, not significant).



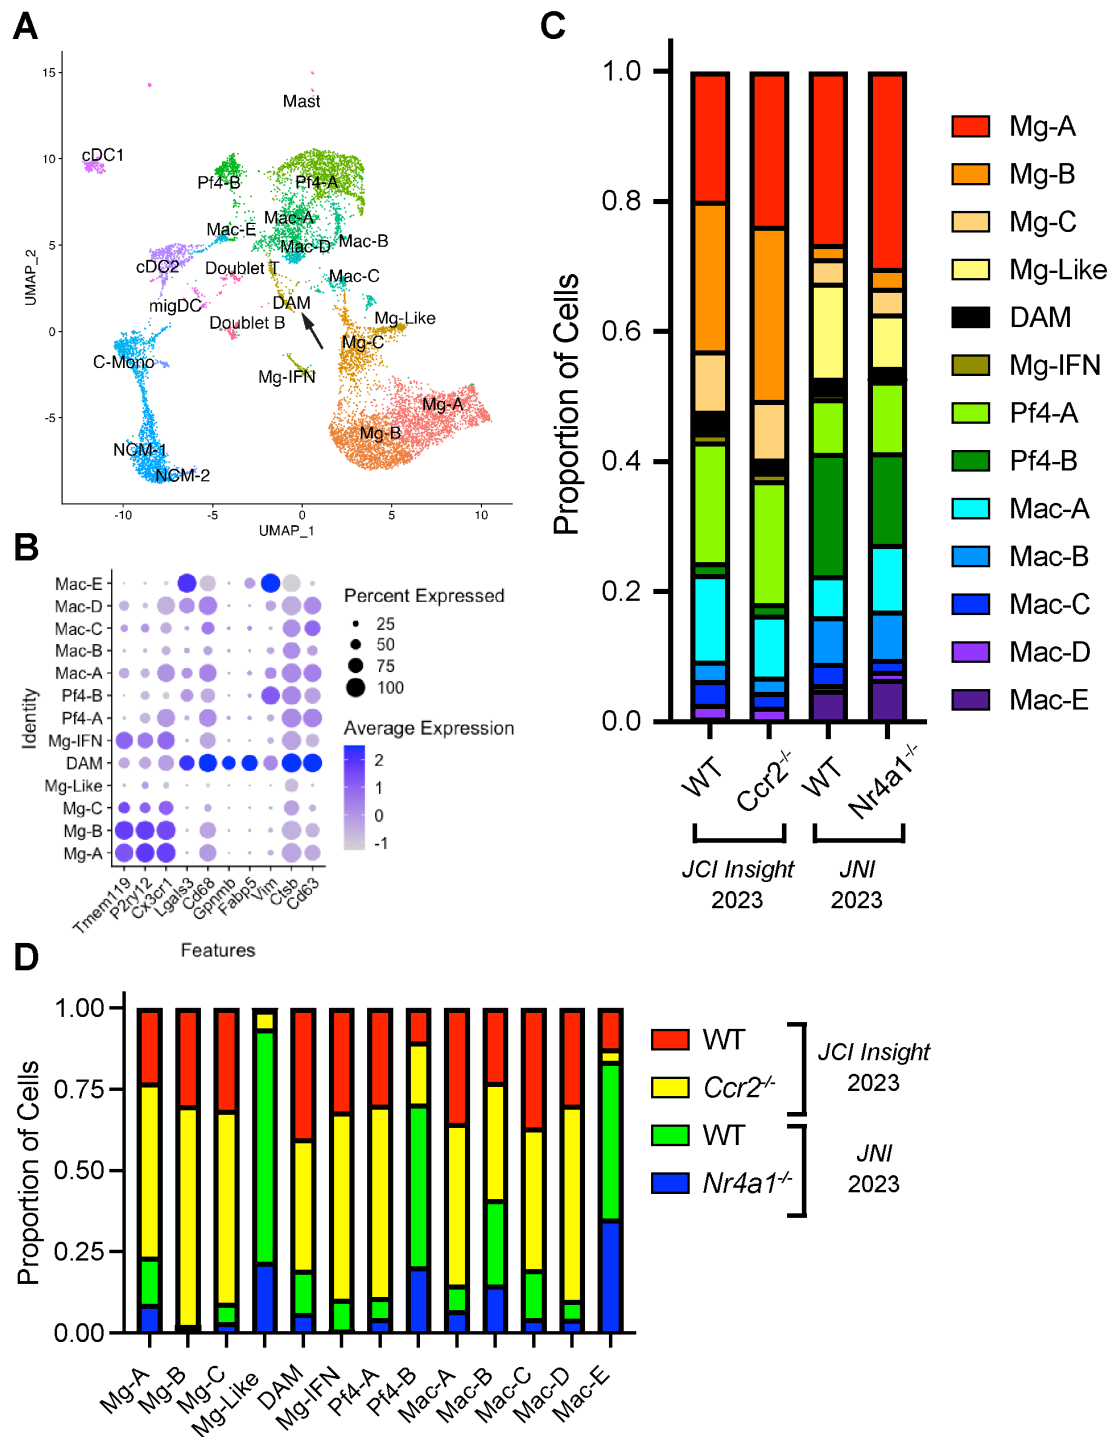

**Supplemental Figure 5.** Disease-associated microglia (DAM) likely correspond to previously published sub-retinal microglia. A: UMAP dimension plot from Fig 5A with arrow identifying DAM cluster. B: DotPlot demonstrating reduced microglia homeostasis genes (Tmem119, Pr2ry12, Cx3cr1) and increased sub-retinal microglia genes (Lgals3 – Cd63) in the DAM cluster. C: Proportion of cells from each sample showing that DAMs (black) represent 1-3% of total macrophages. D: Proportion of cells from each cluster.

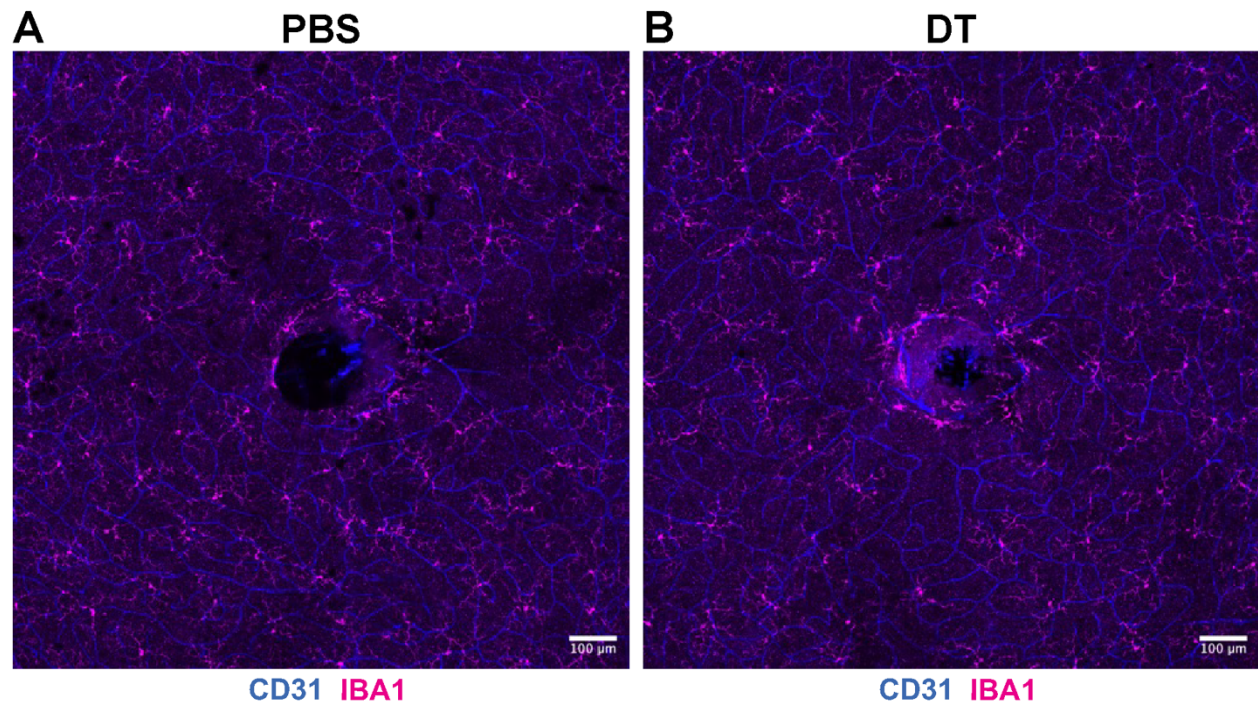

**Supplemental Figure 6: Microglia are unaffected by DT treatment in *Pf4-DTR* mice.** IBA1 macrophages are unchanged in the deep vascular plexus after DT treatment.

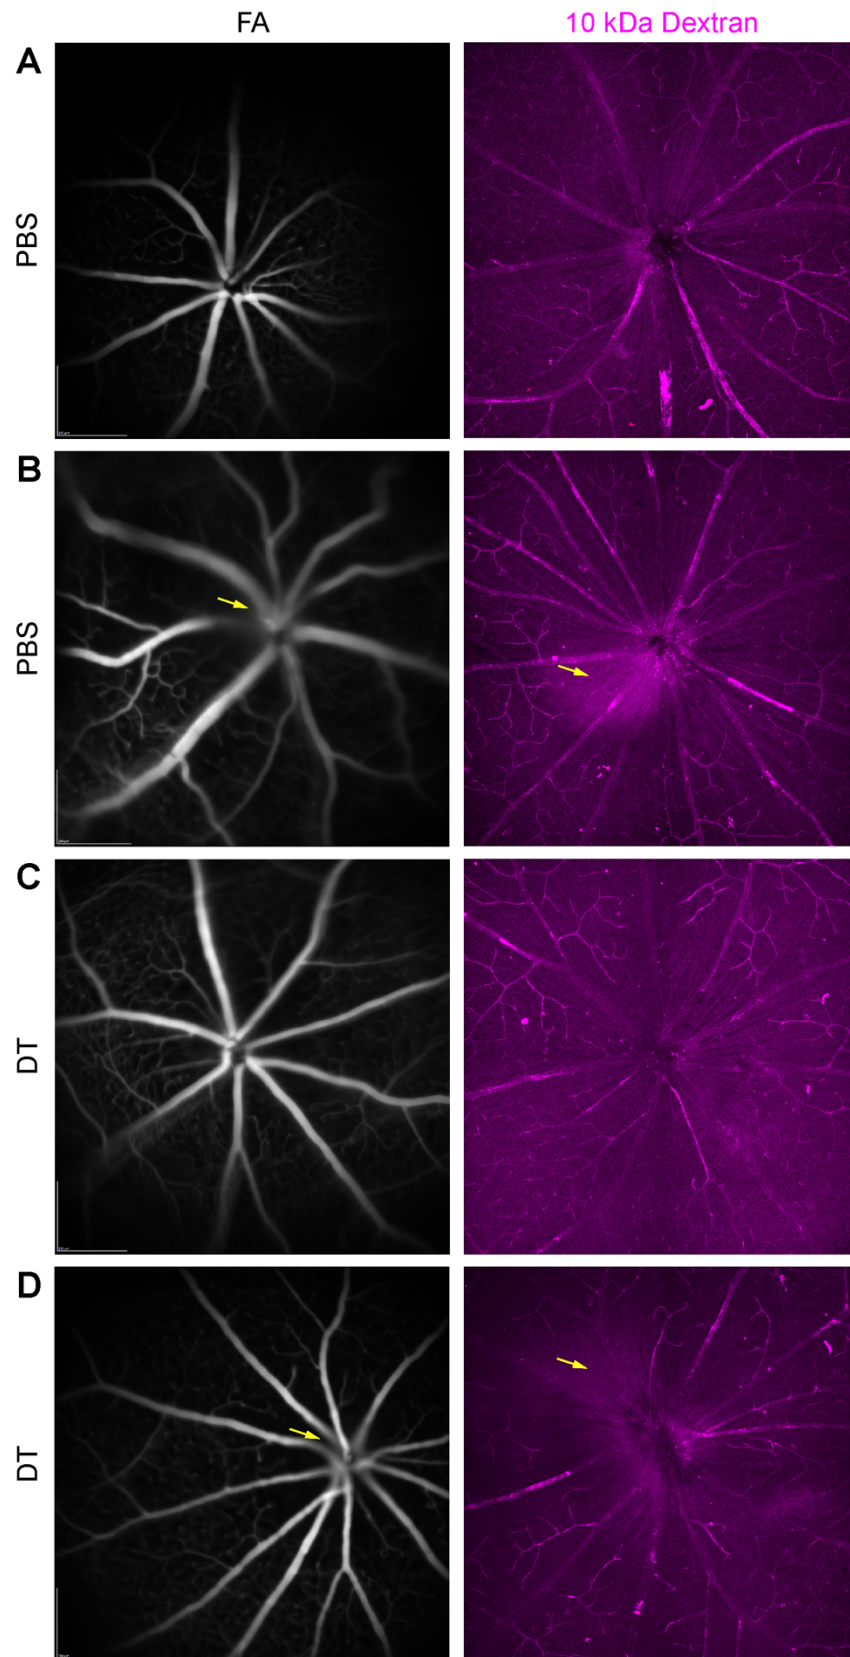

**Supplemental Figure 7. *Pf4-DTR* mice display no change in vascular permeability at steady-state.** A-B: Fluorescein angiography (FA) and 10 kDa Dextran permeability assays in PBS-treated *Pf4-DTR* mice. Seven of 9 eyes showed normal vascular permeability, and 2 of 9 eyes showed increased permeability near the optic nerve head (yellow arrows). C-D: Fluorescein angiography and 10 kDa Dextran permeability assays in DT-treated *Pf4-DTR* mice. Six of 9 eyes showed normal vascular permeability, and 3 of 9 eyes showed increased permeability near the optic nerve head (yellow arrows).



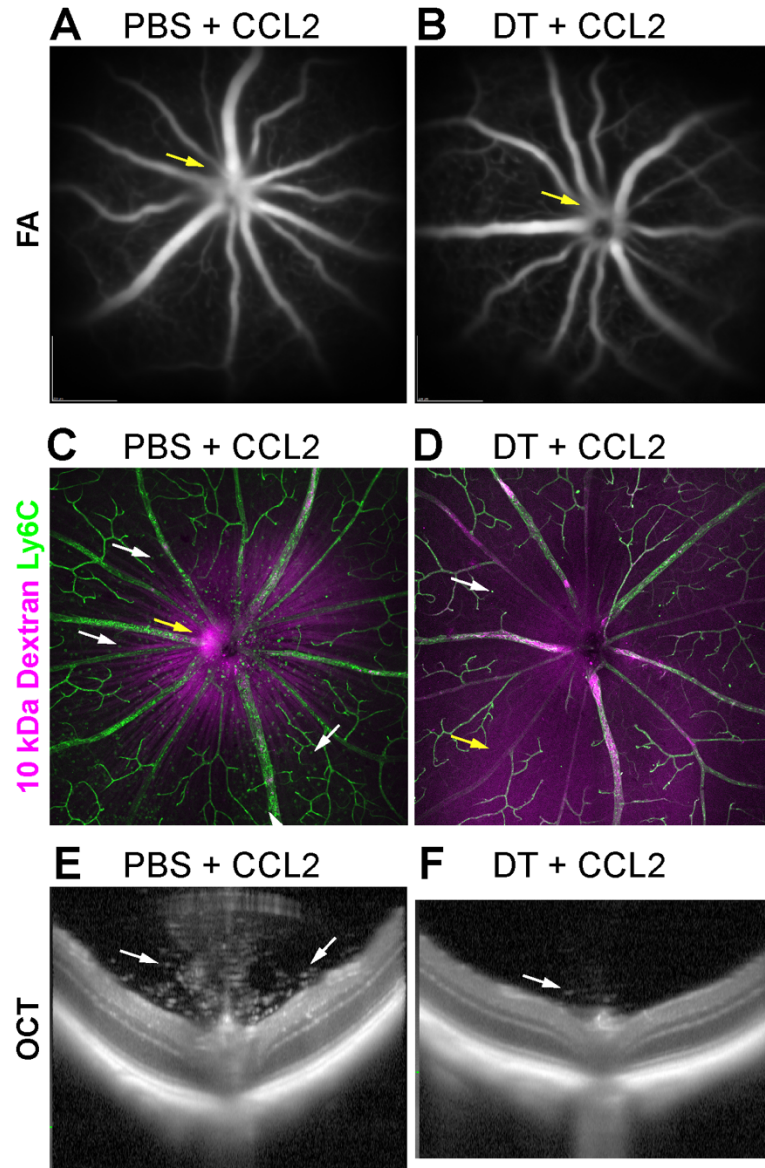

**Supplemental Figure 8. *Pf4-DTR* mice display mild changes in vascular permeability after CCL2 injection.** A-B: Fluorescein angiography (A-B) from PBS (A) and DT (B) treated *Pf4-DTR* mice 18 hours after CCL2 intravitreal injection. Yellow arrows indicate mildly increased permeability by the optic nerve head. C-D: Ly6C and 10 kDa dextran staining from eyes in A-B. White arrows indicate Ly6C<sup>+</sup> cells while yellow arrows indicate increased vascular permeability. DT-treated mice show mildly reduced permeability. E-F: Optical coherence tomography (OCT) images through the optic nerve head show severely diminished inflammatory cells after CCL2 injection in DT-treated mice. G: Total vascular leakage was mildly reduced in DT-treated eyes but similar to the reduction in inflammatory cells.

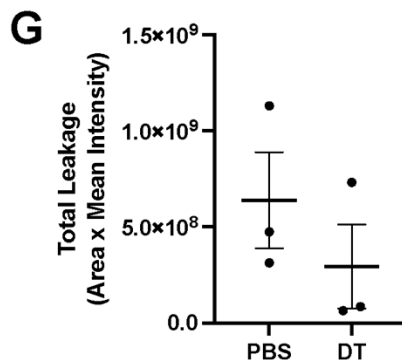



**Supplemental Table 1. Antibodies used for flow cytometry and immunofluorescence studies.**

| <b>Antibody</b>                    | <b>Fluorophore</b> | <b>Dilution</b> | <b>Manufacturer</b>         | <b>Use</b> |
|------------------------------------|--------------------|-----------------|-----------------------------|------------|
| Goat anti-mouse CD31               | -                  | 1:250           | R&D Systems, AF3628         | IF         |
| Rabbit anti-mouse IBA1             | -                  | 1:500           | Wako, 019-19,741            | IF         |
| Chicken anti-mouse GFP             | -                  | 1:6000          | Abcam, ab13970              | IF         |
| Chicken anti-mouse Neurofilament   | -                  | 1:1000          | Abcam, ab134458             | IF         |
| Lectin (biotinylated)              | -                  | 1:200           | Vector Laboratories B-1205  | IF         |
| Smooth Muscle Actin                | -                  | 1:500           | Invitrogen, MA1-06110       | IF         |
| Goat anti-human DTR (Human HB-EGF) | -                  | 1:250           | R&D Systems, AF259          | IF         |
| Rat anti-mouse Ly6C (biotinylated) | -                  | 1:1000          | Abcam, ab54223              | IF         |
| Donkey anti-goat (H + L)           | Alexa Fluor 405    | 1:500           | Invitrogen, A48259          | IF         |
| Donkey anti-chicken (H + L)        | Alexa Fluor 488    | 1:500           | Jackson Immuno, 703-545-155 | IF         |
| Donkey anti-goat (H+L)             | Alexa Fluor 488    | 1:500           | Invitrogen, A11055          | IF         |
| Donkey anti-rat (H + L)            | Alexa Fluor 555    | 1:500           | Invitrogen, A78945          | IF         |
| Streptavidin                       | Alexa Fluor 555    | 1:500           | Invitrogen, S32355          | IF         |
| Donkey anti-rabbit (H + L)         | Alexa Fluor 647    | 1:500           | Invitrogen, A31573          | IF         |
| Fc Block                           |                    |                 | BD Biosciences, 553,142     | Flow       |
| Aqua Live/Dead                     | AmCyan             |                 | ThermoFisher, 65-0866-14    | Flow       |
| CD45                               | BUV395             |                 | BD Biosciences, 564279      | Flow       |
| CD64                               | BV786              |                 | BD Biosciences, 741024      | Flow       |
| CD11b                              | APC-Cy7            |                 | BD Biosciences, 557657      | Flow       |
| Cx3Cr1                             | Alexa Fluor 647    |                 | Biolegend, 149033           | Flow       |
| CD169                              | PE                 |                 | Biolegend, 142404           | Flow       |
| CD206                              | PE-Cy7             |                 | Biolegend, 141720           | Flow       |
| Ly6G                               | PE-CF594           |                 | BD Biosciences, 562700      | Flow       |
| B220                               | PE-CF594           |                 | BD Biosciences, 562313      | Flow       |
| NK1.1                              | PE-CF594           |                 | BD Biosciences, 562864      | Flow       |
| SiglecF                            | PE-CF594           |                 | BD Biosciences, 562757      | Flow       |
| CD4                                | PE-CF594           |                 | BD Biosciences, 562314      | Flow       |
| CD8                                | PE-CF594           |                 | BD Biosciences, 562315      | Flow       |
| Ly6C                               | FITC               |                 | BD Biosciences, 553104      | Flow       |
| Ly6G                               | PE-Cy7             |                 | BD Biosciences, 560601      | Flow       |
| MHCII                              | A700               |                 | Biolegend, 107622           | Flow       |

GFP = green fluorescent protein, DTR = diphtheria toxin receptor, IF = immunofluorescence, Flow = flow cytometry

## Supplemental Table Legends

**Supplemental Table 2. Differential expression analysis between each macrophage cluster and all other cells.** Each tab denotes a cluster of cells including gene names, cluster number, adjusted p-value (p\_val\_adj), percent of cells expressing gene (pct.1 = current cluster, pct.2 = all other clusters), fold change (avg\_logFC = natural log fold change), and raw p-value (p\_val).

**Supplemental Table 3. Gene ontology (GO) outputs for up-regulated genes from each macrophage subtype.** Each tab is from a cluster, including description of GO term, p-value, FDR q-value, fold enrichment, number of genes expressed in macrophages (N), number of genes in GO term (B), number of differentially expressed genes (n), number of differentially expressed genes in the GO term (b), and the specific genes that were differentially expressed in the GO term. Any cluster not included had no significant GO enrichment.
