# Supplementary material for: Retinal perivascular macrophages regulate immune cell infiltration during neuroinflammation in mouse models of ocular disease
Source: J Clin Invest. 2024 Aug 29;134(20):e180904. doi: 10.1172/JCI180904 (PMC11473146; doi:10.1172/JCI180904)
Supplement: Supporting data values [file jci-134-180904-s052.xlsx]

## Sheet: Fig 1C
Microglia	Hyalocyte	pvMac
684	10024	2029
821	13411	2027
836	12537	3031
937	13078	2489
873	14904	2030
508	16093	1534
1129	13481	2284
993	15846	2048
977	17464	2633
738	17923	2426

## Sheet: Fig 1E
Microglia	Hyalocyte	pvMac
418	3059	402
445	3169	482
447	3076	507
241	1786	277
275	1820	224
422	629	379
301	1893	357
300	1863	390
279	1862	254
238	1577	283

## Sheet: Fig 1F
Microglia	Hyalocyte	pvMac
743.64	13.72	12.01
1111.98	51.07	27.94
666.8	18.63	12.42
1665.65	33.35	77.5
923.2	14.51	41.72
672.77	34.26	20.41
624.83	8.05	29.79
758.18	13.16	31.59
893.78	16.39	25.84
2030.57	41.02	59.25

## Sheet: Fig 2E
Superficial	Intermediate	Deep
109	151	149
125	138	128
123	135	160
116	152	147
130	148	149
134	153	128
138	149	140
117	153	155
127	130	158
111	148	133
117	141	149

## Sheet: Fig 2F
Superficial	Intermediate	Deep
20	0	0
8	0	0
20	0	0
28	0	0
38	0	0
36	0	0
24	0	0
32	0	0
22	0	0
18	0	0
22	0	0

## Sheet: Fig 2G
Superficial	Intermediate	Deep
17	0	0
11	0	0
14	0	0
16	0	0
17	0	0
10	0	0
19	0	0
14	0	0
22	0	0
21	0	0
25	0	0

## Sheet: Fig 2H
Mouse #	Cell Type	Total Area (*10^2 um^2)
1	Microglia	13.7
1	Microglia	14.6
1	Microglia	11.9
1	Microglia	14.2
1	Microglia	14.1
1	Microglia	12.7
1	Microglia	12
1	Microglia	12.7
1	Microglia	10.9
1	Microglia	14.2
2	Microglia	12.2
2	Microglia	10.8
2	Microglia	12.7
2	Microglia	11.2
2	Microglia	15.2
2	Microglia	12.5
2	Microglia	10.9
2	Microglia	13.6
2	Microglia	13.5
2	Microglia	11.3
3	Microglia	12.1
3	Microglia	13.3
3	Microglia	13.4
3	Microglia	13.9
3	Microglia	12
3	Microglia	12.7
3	Microglia	14.7
3	Microglia	12.4
3	Microglia	13.3
3	Microglia	12.1
4	Microglia	14.6
4	Microglia	14.9
4	Microglia	10.4
4	Microglia	11.6
4	Microglia	14.1
4	Microglia	11.7
4	Microglia	15.2
4	Microglia	12.3
4	Microglia	11.8
4	Microglia	13.3
5	Microglia	12.6
5	Microglia	11
5	Microglia	12.5
5	Microglia	11.6
5	Microglia	13.1
5	Microglia	12
5	Microglia	14
5	Microglia	13.7
5	Microglia	11.8
5	Microglia	13.2
1	pvMac	11
1	pvMac	9.59
1	pvMac	8.28
1	pvMac	9.29
1	pvMac	8.7
2	pvMac	10.3
2	pvMac	8.81
2	pvMac	8.22
2	pvMac	6.13
2	pvMac	6.46
3	pvMac	9.52
3	pvMac	10.7
3	pvMac	10.1
3	pvMac	8.07
3	pvMac	8.74
4	pvMac	9.53
4	pvMac	8.83
4	pvMac	11.2
4	pvMac	7.26
4	pvMac	8.79
5	pvMac	8.97
5	pvMac	6.04
5	pvMac	8.03
5	pvMac	8.3
5	pvMac	9.99
1	Hyalocyte	4.52
1	Hyalocyte	8.94
1	Hyalocyte	8.99
1	Hyalocyte	6.15
2	Hyalocyte	11.5
2	Hyalocyte	8.72
2	Hyalocyte	2.58
2	Hyalocyte	11.8
2	Hyalocyte	10.5
3	Hyalocyte	5.97
3	Hyalocyte	5.96
3	Hyalocyte	13
3	Hyalocyte	10.1
4	Hyalocyte	11
4	Hyalocyte	8.88
4	Hyalocyte	11.2
4	Hyalocyte	10.5
5	Hyalocyte	11.1
5	Hyalocyte	9.82
5	Hyalocyte	9.07
5	Hyalocyte	8.22
6	Hyalocyte	12.4
6	Hyalocyte	11.5
6	Hyalocyte	9.01
6	Hyalocyte	11.2

## Sheet: Fig 2I
Mouse #	Cell Type	Spanned Area (*10^2 um^2)
1	Microglia	36.3
1	Microglia	31.7
1	Microglia	25.7
1	Microglia	44.7
1	Microglia	41.6
1	Microglia	41.7
1	Microglia	21
1	Microglia	31.5
1	Microglia	36.6
1	Microglia	24.7
2	Microglia	42.9
2	Microglia	33.5
2	Microglia	25.2
2	Microglia	42.6
2	Microglia	32.8
2	Microglia	27.7
2	Microglia	29.1
2	Microglia	31.8
2	Microglia	39.5
2	Microglia	33.1
3	Microglia	36.1
3	Microglia	37.4
3	Microglia	38.9
3	Microglia	38.8
3	Microglia	42.4
3	Microglia	32
3	Microglia	43.9
3	Microglia	50.8
3	Microglia	28.2
3	Microglia	43.1
4	Microglia	45.2
4	Microglia	36.9
4	Microglia	37.1
4	Microglia	34.7
4	Microglia	27
4	Microglia	37.5
4	Microglia	40.4
4	Microglia	37.1
4	Microglia	41.2
4	Microglia	18.3
5	Microglia	46.5
5	Microglia	35.1
5	Microglia	43.9
5	Microglia	31.5
5	Microglia	34.7
5	Microglia	26.1
5	Microglia	47.5
5	Microglia	26.7
5	Microglia	42.9
5	Microglia	32.1
1	pvMac	9.61
1	pvMac	12.2
1	pvMac	11.8
1	pvMac	12.3
1	pvMac	12.6
2	pvMac	11
2	pvMac	8.05
2	pvMac	11
2	pvMac	11.5
2	pvMac	11.2
3	pvMac	14.4
3	pvMac	9.88
3	pvMac	9.9
3	pvMac	8.99
3	pvMac	12.8
4	pvMac	13.5
4	pvMac	11.4
4	pvMac	11.7
4	pvMac	14.9
4	pvMac	10.5
5	pvMac	10.2
5	pvMac	8.5
5	pvMac	11.2
5	pvMac	12.4
5	pvMac	9.44
1	Hyalocyte	15.9
1	Hyalocyte	9.23
1	Hyalocyte	7.39
1	Hyalocyte	15.7
2	Hyalocyte	11.3
2	Hyalocyte	11.4
2	Hyalocyte	12.9
2	Hyalocyte	10.9
2	Hyalocyte	11.9
3	Hyalocyte	10.1
3	Hyalocyte	8.05
3	Hyalocyte	7.89
3	Hyalocyte	6.95
4	Hyalocyte	11.4
4	Hyalocyte	7.45
4	Hyalocyte	5.14
4	Hyalocyte	9.4
5	Hyalocyte	8.54
5	Hyalocyte	7.54
5	Hyalocyte	11.5
5	Hyalocyte	12.9
6	Hyalocyte	13
6	Hyalocyte	8.91
6	Hyalocyte	11.5
6	Hyalocyte	8.73

## Sheet: Fig 2J
Mouse #	Cell Type	Tree Length (*10^2 um)
1	Microglia	15.7
1	Microglia	19.5
1	Microglia	14.6
1	Microglia	15.3
1	Microglia	18.6
1	Microglia	15.6
1	Microglia	20
1	Microglia	19.8
1	Microglia	15.8
1	Microglia	19.4
2	Microglia	24.7
2	Microglia	21.4
2	Microglia	20.9
2	Microglia	15.5
2	Microglia	18.3
2	Microglia	11.4
2	Microglia	15.1
2	Microglia	17.7
2	Microglia	15.8
2	Microglia	19
3	Microglia	16.4
3	Microglia	14
3	Microglia	19.7
3	Microglia	15.1
3	Microglia	13.9
3	Microglia	11.5
3	Microglia	18.7
3	Microglia	15.8
3	Microglia	14.9
3	Microglia	14.6
4	Microglia	13.5
4	Microglia	17.6
4	Microglia	15.4
4	Microglia	16.7
4	Microglia	15.4
4	Microglia	15
4	Microglia	15.7
4	Microglia	14.8
4	Microglia	15.7
4	Microglia	16.5
5	Microglia	21.2
5	Microglia	14.7
5	Microglia	13
5	Microglia	13.7
5	Microglia	19.6
5	Microglia	20.3
5	Microglia	19.7
5	Microglia	16.7
5	Microglia	17.1
5	Microglia	17.6
1	pvMac	9.45
1	pvMac	8.87
1	pvMac	8.49
1	pvMac	4.53
1	pvMac	9.48
2	pvMac	8.28
2	pvMac	6.79
2	pvMac	7.16
2	pvMac	9.87
2	pvMac	11.2
3	pvMac	6.39
3	pvMac	9.84
3	pvMac	6.96
3	pvMac	8.32
3	pvMac	7.73
4	pvMac	4.93
4	pvMac	9.31
4	pvMac	9.12
4	pvMac	7.78
4	pvMac	5.42
5	pvMac	7.38
5	pvMac	8.27
5	pvMac	10.2
5	pvMac	7.6
5	pvMac	7.25
1	Hyalocyte	5.84
1	Hyalocyte	7.94
1	Hyalocyte	5.98
1	Hyalocyte	9.04
2	Hyalocyte	6.45
2	Hyalocyte	8.5
2	Hyalocyte	7.71
2	Hyalocyte	4.79
2	Hyalocyte	7.24
3	Hyalocyte	8.3
3	Hyalocyte	12.3
3	Hyalocyte	4.81
3	Hyalocyte	6.77
4	Hyalocyte	6.89
4	Hyalocyte	7.98
4	Hyalocyte	5.15
4	Hyalocyte	8.23
5	Hyalocyte	5.04
5	Hyalocyte	5.68
5	Hyalocyte	10.2
5	Hyalocyte	6.33
6	Hyalocyte	6.59
6	Hyalocyte	7.33
6	Hyalocyte	7.06
6	Hyalocyte	7.76

## Sheet: Fig 2K
Mouse #	Cell Type	Ramification Index
1	Microglia	14.2
1	Microglia	19.8
1	Microglia	17.7
1	Microglia	16
1	Microglia	17
1	Microglia	17.2
1	Microglia	16.1
1	Microglia	19.9
1	Microglia	16.5
1	Microglia	14.9
2	Microglia	14.5
2	Microglia	13.9
2	Microglia	14.3
2	Microglia	18.1
2	Microglia	16.1
2	Microglia	15.9
2	Microglia	17.6
2	Microglia	15.4
2	Microglia	14.3
2	Microglia	16.1
3	Microglia	17.9
3	Microglia	16.7
3	Microglia	12.7
3	Microglia	16.4
3	Microglia	15.9
3	Microglia	13.7
3	Microglia	13.3
3	Microglia	16.6
3	Microglia	17
3	Microglia	15.3
4	Microglia	12.9
4	Microglia	18.8
4	Microglia	16.5
4	Microglia	16.4
4	Microglia	16.5
4	Microglia	19.4
4	Microglia	16.8
4	Microglia	15.8
4	Microglia	19.9
4	Microglia	12.4
5	Microglia	12
5	Microglia	15.9
5	Microglia	14.5
5	Microglia	16.4
5	Microglia	13.9
5	Microglia	14.2
5	Microglia	16
5	Microglia	15.9
5	Microglia	13.9
5	Microglia	16.9
1	pvMac	10.8
1	pvMac	4.83
1	pvMac	7.7
1	pvMac	8.54
1	pvMac	6.23
2	pvMac	2.76
2	pvMac	5.86
2	pvMac	9.89
2	pvMac	8.74
2	pvMac	9.93
3	pvMac	6.91
3	pvMac	10.9
3	pvMac	6.55
3	pvMac	6.37
3	pvMac	6.47
4	pvMac	6.98
4	pvMac	7.03
4	pvMac	4.72
4	pvMac	7.66
4	pvMac	5.2
5	pvMac	10.3
5	pvMac	5.78
5	pvMac	5.64
5	pvMac	8.1
5	pvMac	8.58
1	Hyalocyte	2.03
1	Hyalocyte	3.2
1	Hyalocyte	2.57
1	Hyalocyte	3.37
2	Hyalocyte	1.65
2	Hyalocyte	4.15
2	Hyalocyte	2.68
2	Hyalocyte	3.79
2	Hyalocyte	2.91
3	Hyalocyte	1.08
3	Hyalocyte	2.82
3	Hyalocyte	1.11
3	Hyalocyte	2.97
4	Hyalocyte	3.02
4	Hyalocyte	1.62
4	Hyalocyte	1.88
4	Hyalocyte	3.71
5	Hyalocyte	4.18
5	Hyalocyte	3.28
5	Hyalocyte	2.5
5	Hyalocyte	1.24
6	Hyalocyte	4.77
6	Hyalocyte	4.22
6	Hyalocyte	3.46
6	Hyalocyte	3.7

[truncated: 14 more sheets: Fig 3B, Fig 3C, Fig 3D, Fig 4B, Fig 4C, Fig 4F, Fig 5D, Fig 5F, Fig 6B, Fig 7C, Fig 7F, Fig S4D, Fig S4E, Fig S8G]
